# Supplementary material for: Effect of individual food preferences on oscillatory brain activity
Source: PubMed Central journal article supplement (PMC6520299; doi:10.1002/brb3.1262), 2019-04-04
Supplement: BRB3-9-e01262-s001.pdf [file BRB3-9-e01262-s001.pdf]

Supplementary Information for  
**Effect of individual food preferences on oscillatory  
brain activity**

Nachie Tashiro<sup>a</sup>, Hisato Sugata<sup>b</sup>, Takashi Ikeda<sup>c</sup>, Kojiro Matsushita<sup>d</sup>,  
Masayuki Hara<sup>e</sup>, Kenji Kawakami<sup>b</sup>, Minoru Fujiki<sup>a</sup>, Keisuke Kawakami<sup>b</sup>

<sup>a</sup>Department of Neurosurgery, Graduate School of Medicine, Oita University, Oita, Japan

<sup>b</sup>Faculty of Welfare and Health Science, Oita University, Oita, Japan

<sup>c</sup>Research Center for Child Mental Development, Kanazawa University, Kanazawa, Japan

<sup>d</sup>Department of Mechanical Engineering, Gifu University, Gifu, Japan

<sup>e</sup>Graduate School of Science and Engineering, Saitama University, Saitama, Japan

Contents:

Supplementary figures 1-2

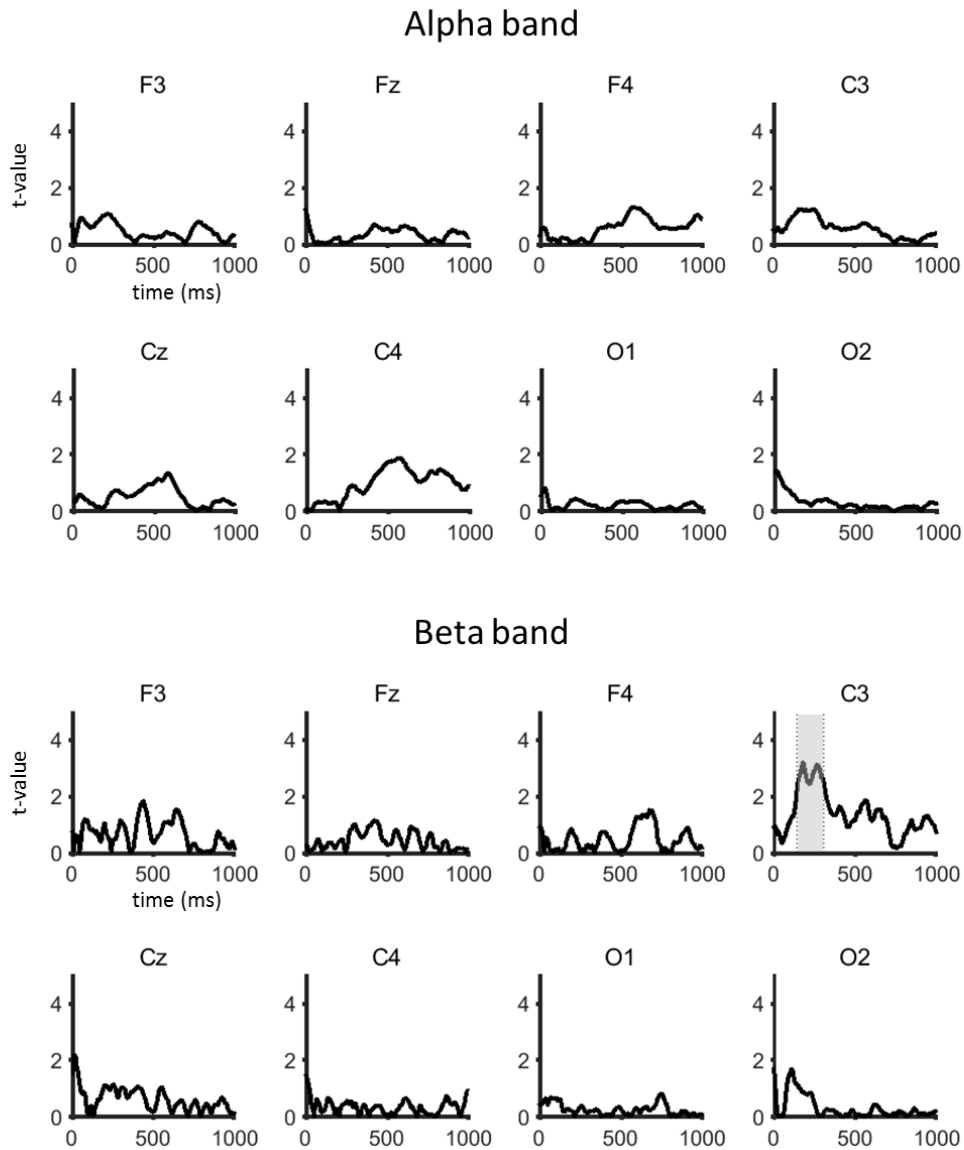

Figure S1. T values at each time point in the alpha and beta bands during the observation of favorite foods (FF) and disliked foods (DF). 0 ms corresponds to onset of food visual stimulus. Gray shaded area indicates time points of significant differences between FF and DF ( $p < 0.05$ ).

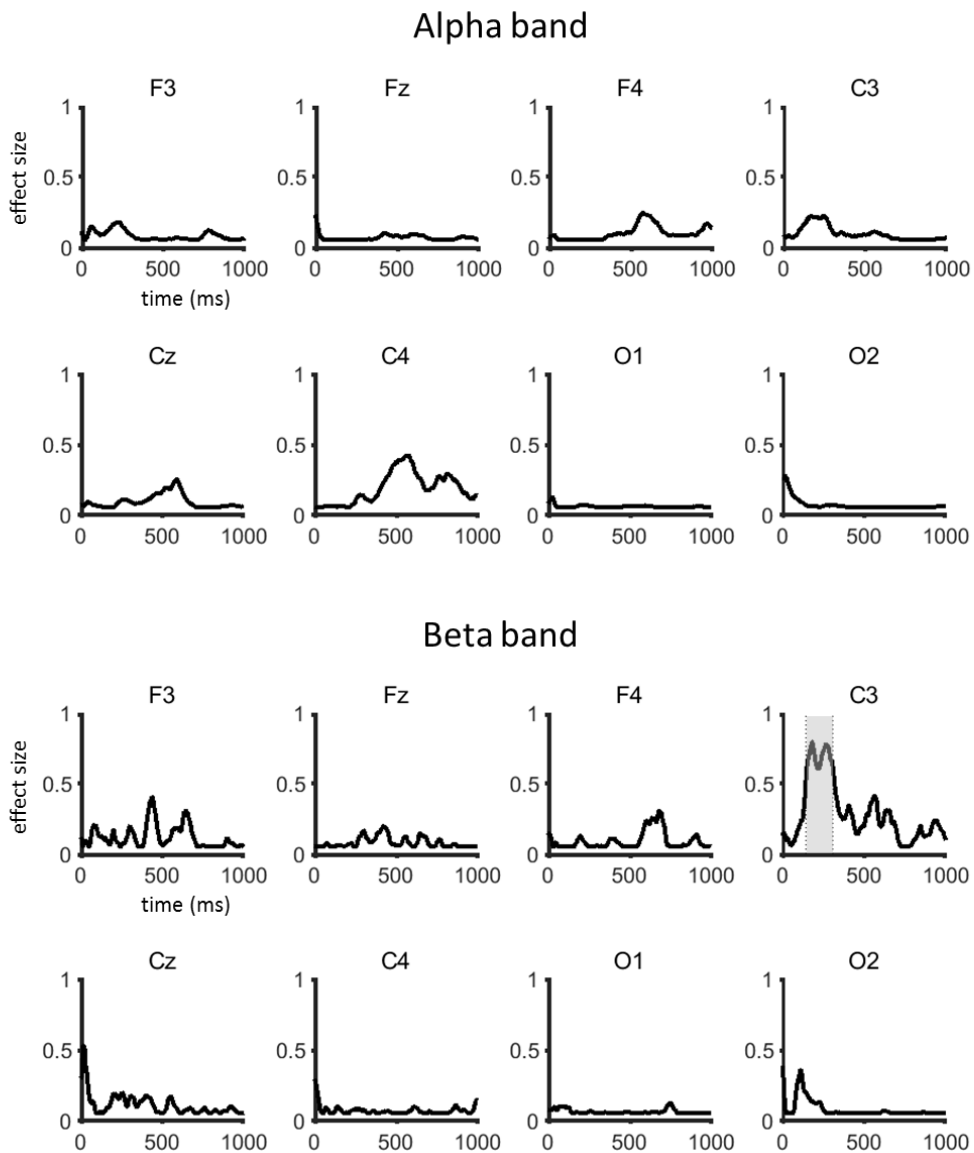

Figure S2. Effect size in each time point in the alpha and beta bands during the observation of favorite foods (FF) and disliked foods (DF). 0 ms corresponds to onset of food visual stimulus. Gray shaded area indicates time points of significant differences between FF and DF ( $p < 0.05$ ).
